# Supplementary material for: Pulmonary Iron Homeostasis in Hepcidin Knockout Mice
Source: PubMed Central journal article supplement (PMC5650979; doi:10.3389/fphys.2017.00804), 2017-10-17
Supplement: DataSheet1.pdf [file DataSheet1.pdf]

## *Supplemental Material*

### **Pulmonary iron homeostasis in hepcidin knockout mice**

Jean-Christophe Deschemin<sup>1,2,3,4</sup>, Jacques RR Mathieu<sup>1,2,3,4,\$</sup>, Sara Zumerle<sup>1,2,3,4,\$</sup>, Carole Peyssonnaud<sup>1,2,3,4</sup> and Sophie Vulont<sup>1,2,3,4\*</sup>

<sup>\$</sup> These authors contributed equally to this work

<sup>1</sup> INSERM, U1016, Institut Cochin, Paris, France

<sup>2</sup> CNRS, UMR8104, Paris, France

<sup>3</sup> Université Paris Descartes, Sorbonne Paris Cité, Paris, France

<sup>4</sup> Laboratory of Excellence GR-Ex

**\* Correspondence:**

Corresponding Author

sophie.vulont@inserm.fr

## Supplementary Figures

### Figure S1

#### Mouse primers sequences used for real-time PCR

| HGNC Symbol                    | Primer  | Sequence (5'-3')              |
|--------------------------------|---------|-------------------------------|
| <i>Hamp1</i> (Hepcidin1)       | Forward | CCT ATC TCC ATC AAC AGA T     |
|                                | Reverse | TGC AAC AGA TAC CAC ACT G     |
| <i>Slc40A1</i> (Ferroportin)   | Forward | TTG CAG GAG TCA TTG CTG CTA   |
|                                | Reverse | TGG AGT TCT GCA CAC CAT TGA T |
| <i>Hmox1</i> (Heme Oxygenase1) | Forward | GTC AAG CAC AGG GTG ACA GA    |
|                                | Reverse | ATC ACC TGC AGC TCC TCA AA    |
| <i>Ftl</i> (L-Ferritin)        | Forward | GGG CCT CCT ACA CCT ACC TC    |
|                                | Reverse | CTC CTG GGT TTT ACC CCA TT    |
| <i>Fth</i> (H-Ferritin)        | Forward | GAC CGA GAT GAT GTG GCT CT    |
|                                | Reverse | GTG CAC ACT CCA TTG CAT TC    |
| <i>TfrC</i> (Tfr1)             | Forward | TCC GCT CGT GGA GAC TAC TT    |
|                                | Reverse | TCA AGT TCT CCA CTA AAG C     |
| <i>Slc11a2</i> (DMT1+IRE)      | Forward | TGT TTG ATT GCA TTG GGT CTG   |
|                                | Reverse | CGC TCA GCA GGA CTT TCG AG    |
| <i>Ppia</i> (Cyclophilin A)    | Forward | ATG GCA CTG GCG GCA GGT CC    |
|                                | Reverse | TTG CCA TTC CTG GAC CCA AA    |
| <i>CXCL1</i>                   | Forward | CAA TGA GCT GCG CTG TCA GTG   |
|                                | Reverse | CTT GGG GAC ACC TTT TAG CAT C |
| <i>CXCL2</i>                   | Forward | CCA AGG GTT GAC TTC AAG AAC   |
|                                | Reverse | AGC GAG GCA CAT CAG GTA CG    |

Figure S2

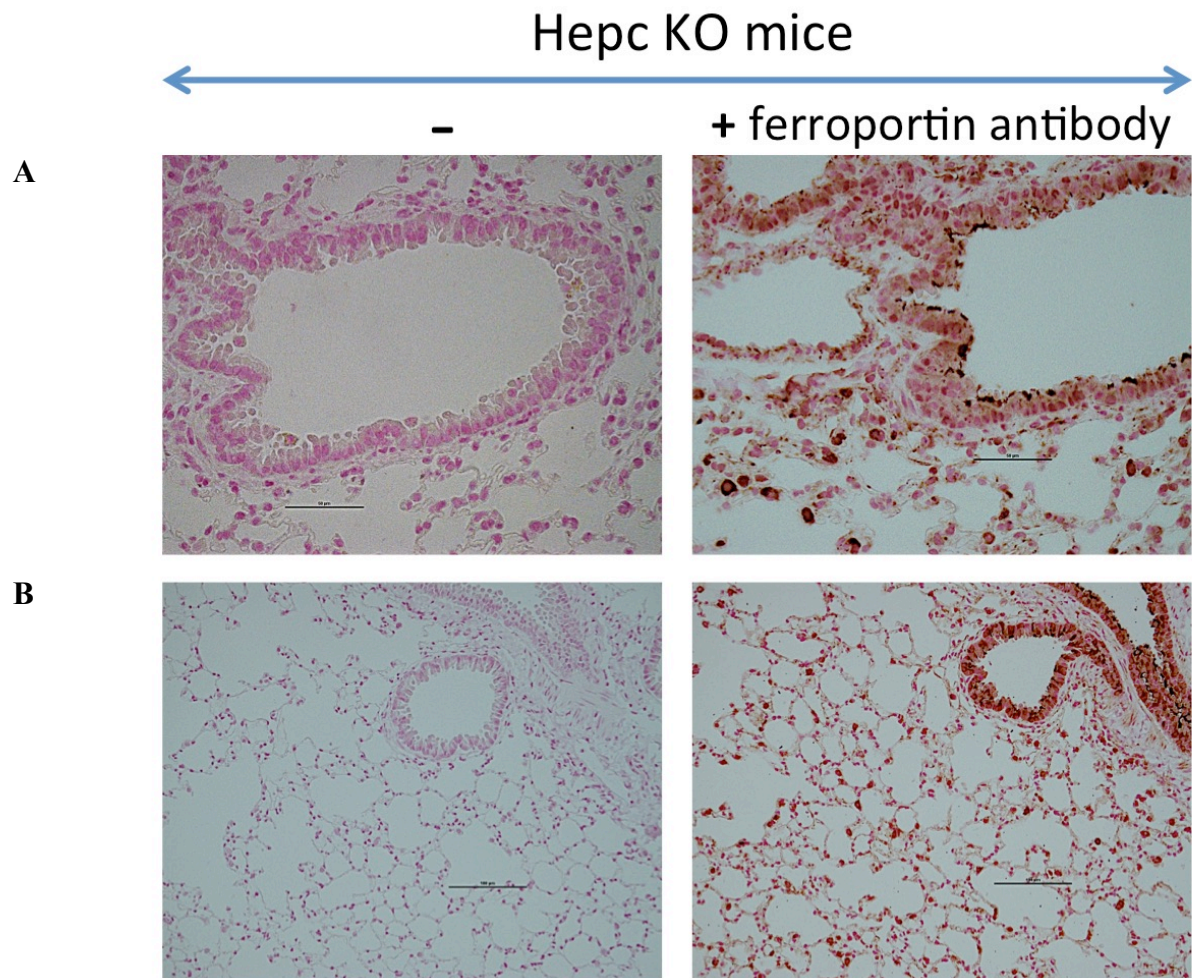

**Supplementary Figure 2: Lung section from Hepc KO mice**

Immunostaining without (-) or with (+) primary ferroportin antibody was performed on lung sections from Hepc KO mice. The scale bars indicate 50  $\mu\text{m}$  (A) and 100  $\mu\text{m}$  (B).

**Figure S3**

**A**

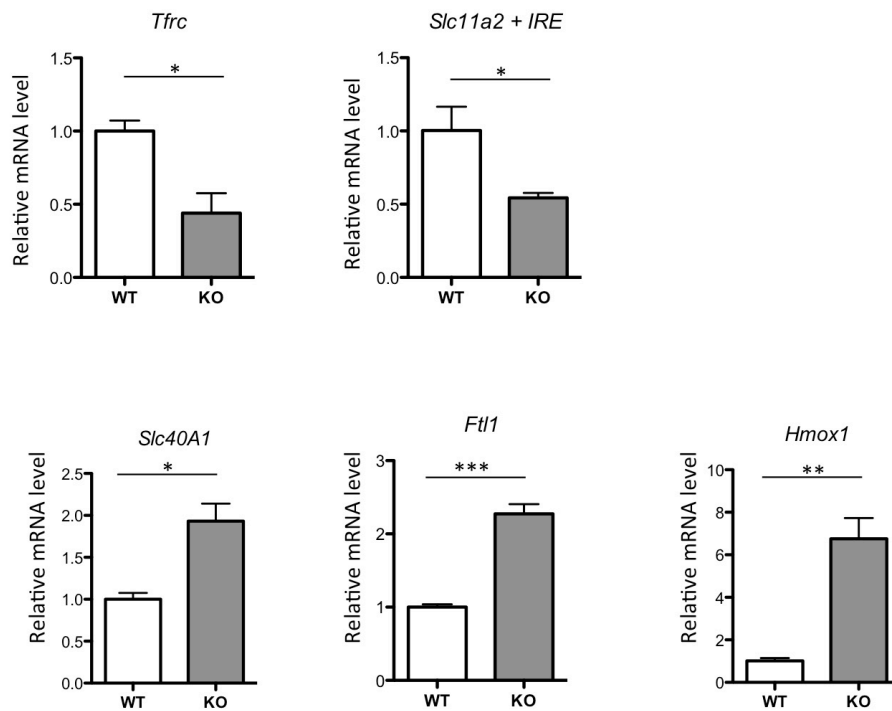

**B**

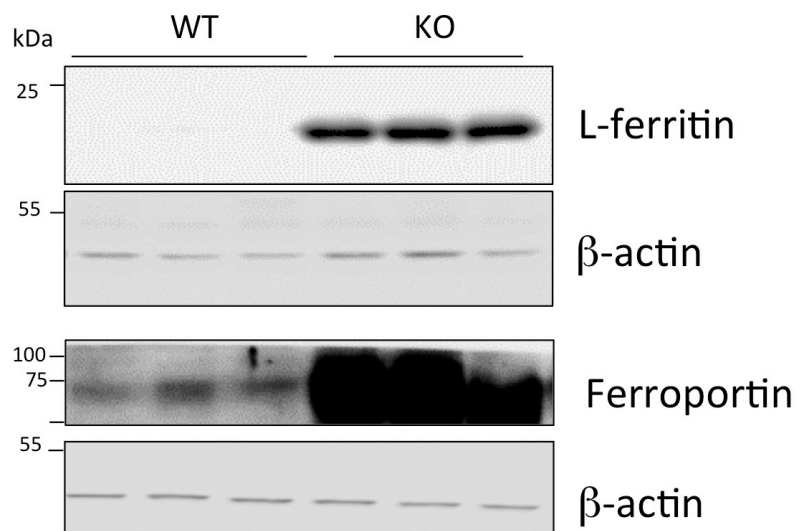

**Supplementary Figure 3: Iron load phenotype in the liver of WT and Hepc KO mice:**

Hepatic *Tfrc*, *Slc11a2 + IRE*, *Slc40A1*, *Ft11* and *Hmox1* mRNA levels relative to *Ppia* analyzed by real-time PCR. Changes are expressed relative to WT mice (A).

L-ferritin and ferroportin protein levels analyzed by WB using proteins from cytosolic and membrane enriched-fractions, respectively (B).

Error bars represent SEM for n=3 mice in each group. Statistical significance is indicated by asterisks (\* $p < 0.05$ , \*\* $p < 0.01$ , \*\*\* $p < 0.001$ ).

Figure S4

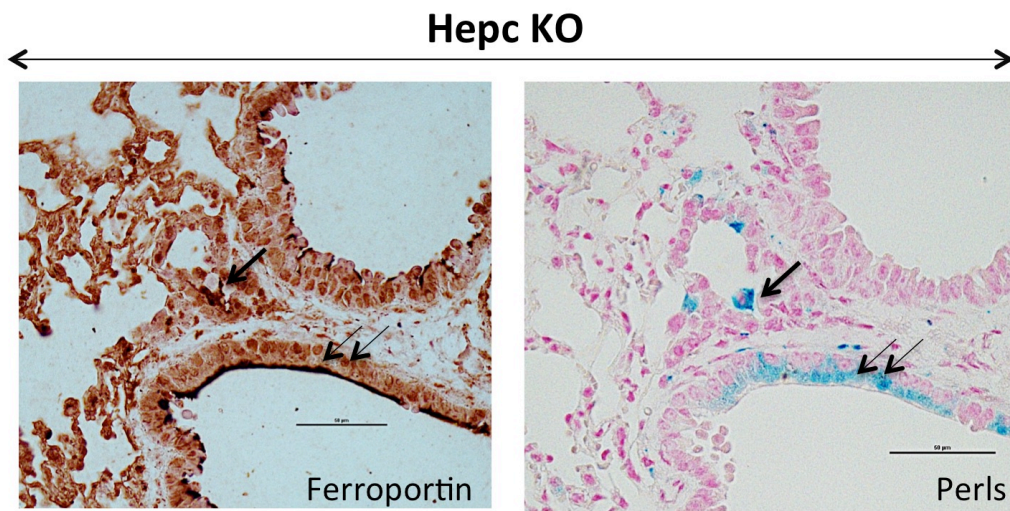

**Supplementary Figure 4: Lung staining analysis in WT and Hpc KO mice**

Ferroportin immunostaining and Perls' blue staining of lung section from KO mice. Arrows indicate the co-detection of ferroportin and iron in AM and epithelial cells on two consecutive slides. The scale bars indicate 50 μm.

**Figure S5**

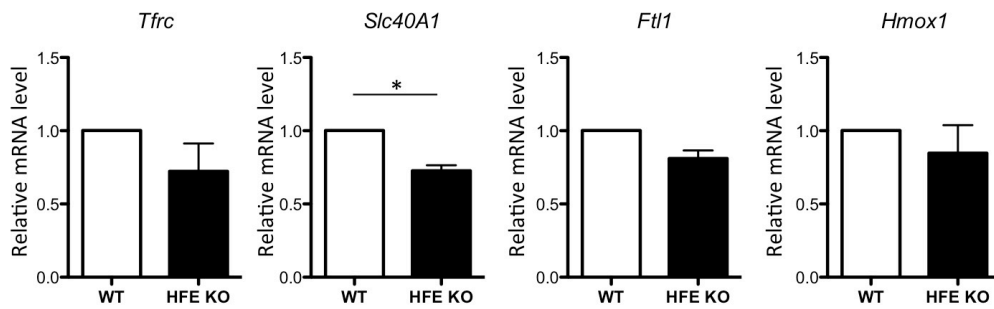

**Supplementary Figure 5: Iron-related genes in AM isolated from the lung of WT and HFE KO mice:**

*Tfr*, *Slc40A1*, *Ft1* and *Hmox1* mRNA levels relative to *Ppia* analyzed by real-time PCR in AM. The WT AM cells have been used as reference for each single experiment of AM isolation performed on an-age matched couple of WT and HFE KO mice, and the data that are expressed in fold change. Error bars represent SEM for n=3 mice in each group. Statistical significance is indicated by asterisks (\*p < 0.05).

**Figure S6**

**A**

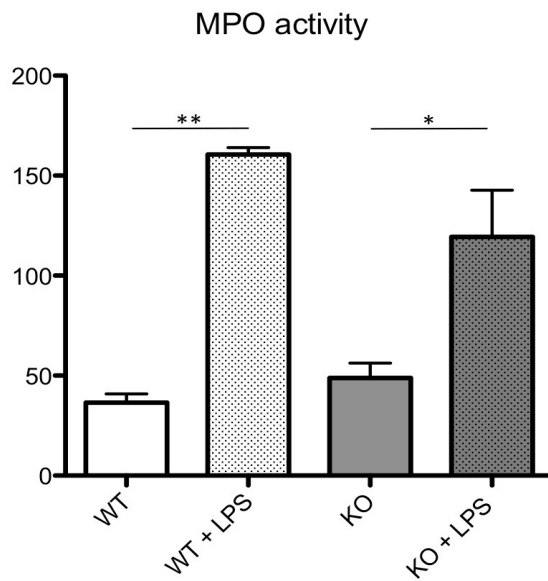

**B**

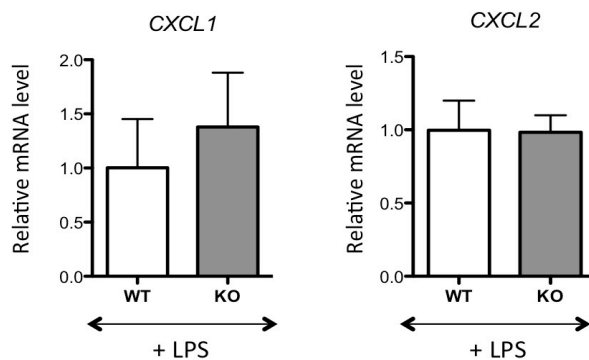

**Supplementary Figure 6: MPO activity and chemokine responses in the lung of IP LPS treated WT and Hcpc KO mice:**

MPO activity, expressed in units per mg of tissue was measured in the lung of mice IP injected for 6h by LPS (A). Error bars represent SEM for n=3-6 mice by group. Statistical analysis was performed using one-way analysis of variance (ANOVA), Bonferroni's multiple comparison. Statistical significance is indicated by \* asterisks (\*p < 0.05, \*\*p < 0.001).

*CXCL1* and *CXCL2* mRNA levels relative to *Ppia*, analyzed by real-time PCR in the lung of mice after 5h of intranasal LPS instillation (B). Changes are expressed relative to WT injected mice.

Figure S7

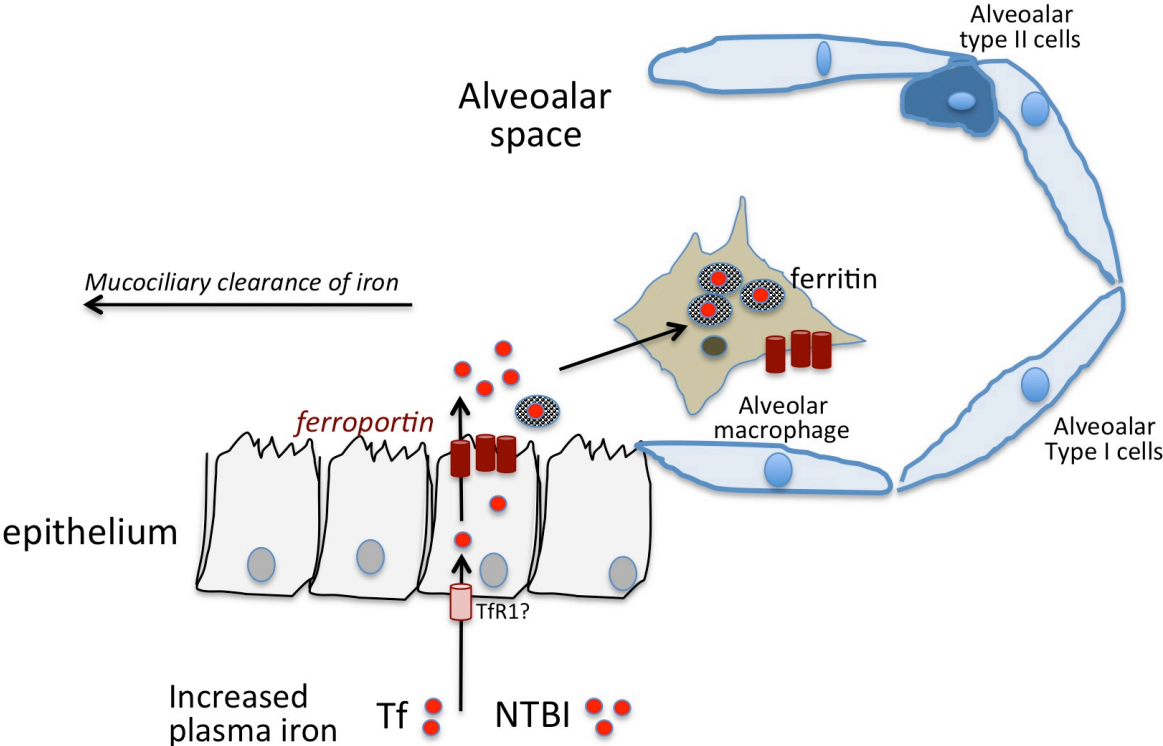

Supplementary Figure 7: Schematic representation of iron handling in the lung of the Hepc KO mice (Tf , transferrin, NTBI, non transferrin bouf iron).
